# Supplementary material for: A randomized controlled trial of postbiotic administration during antibiotic treatment increases microbiome diversity and enriches health associated taxa
Source: bioRxiv or medRxiv preprint supplement (doi:10.1101/2024.07.25.24311015), 2024-07-26
Supplement: Supplementary file [file media-1.pdf]

Enrollment

Evaluated for eligibility (n=51)

Excluded (n=1)

- not meeting inclusion criteria (n=0)
- not willing (n=1)

Allocation

Placebo (C): 22  
received C: 22  
did not receive C: 0

Treatment (T): 28  
received T: 28  
did not receive T: 0

Follow-up

discontinued: 6  
adverse event: 0  
withdrew consent: 6  
other: 0

discontinued: 12  
adverse event: 0  
withdrew consent: 11  
other: 1

Analysis

Full Analysis Set: 16  
Excluded from FAS: 0

Full Analysis Set: 16  
Excluded from FAS: 0
