# Supplementary material for: A randomized controlled trial of postbiotic administration during antibiotic treatment increases microbiome diversity and enriches health associated taxa
Source: bioRxiv or medRxiv preprint supplement (doi:10.1101/2024.07.25.24311015), 2024-07-26

Sample S2

Sample S1-3

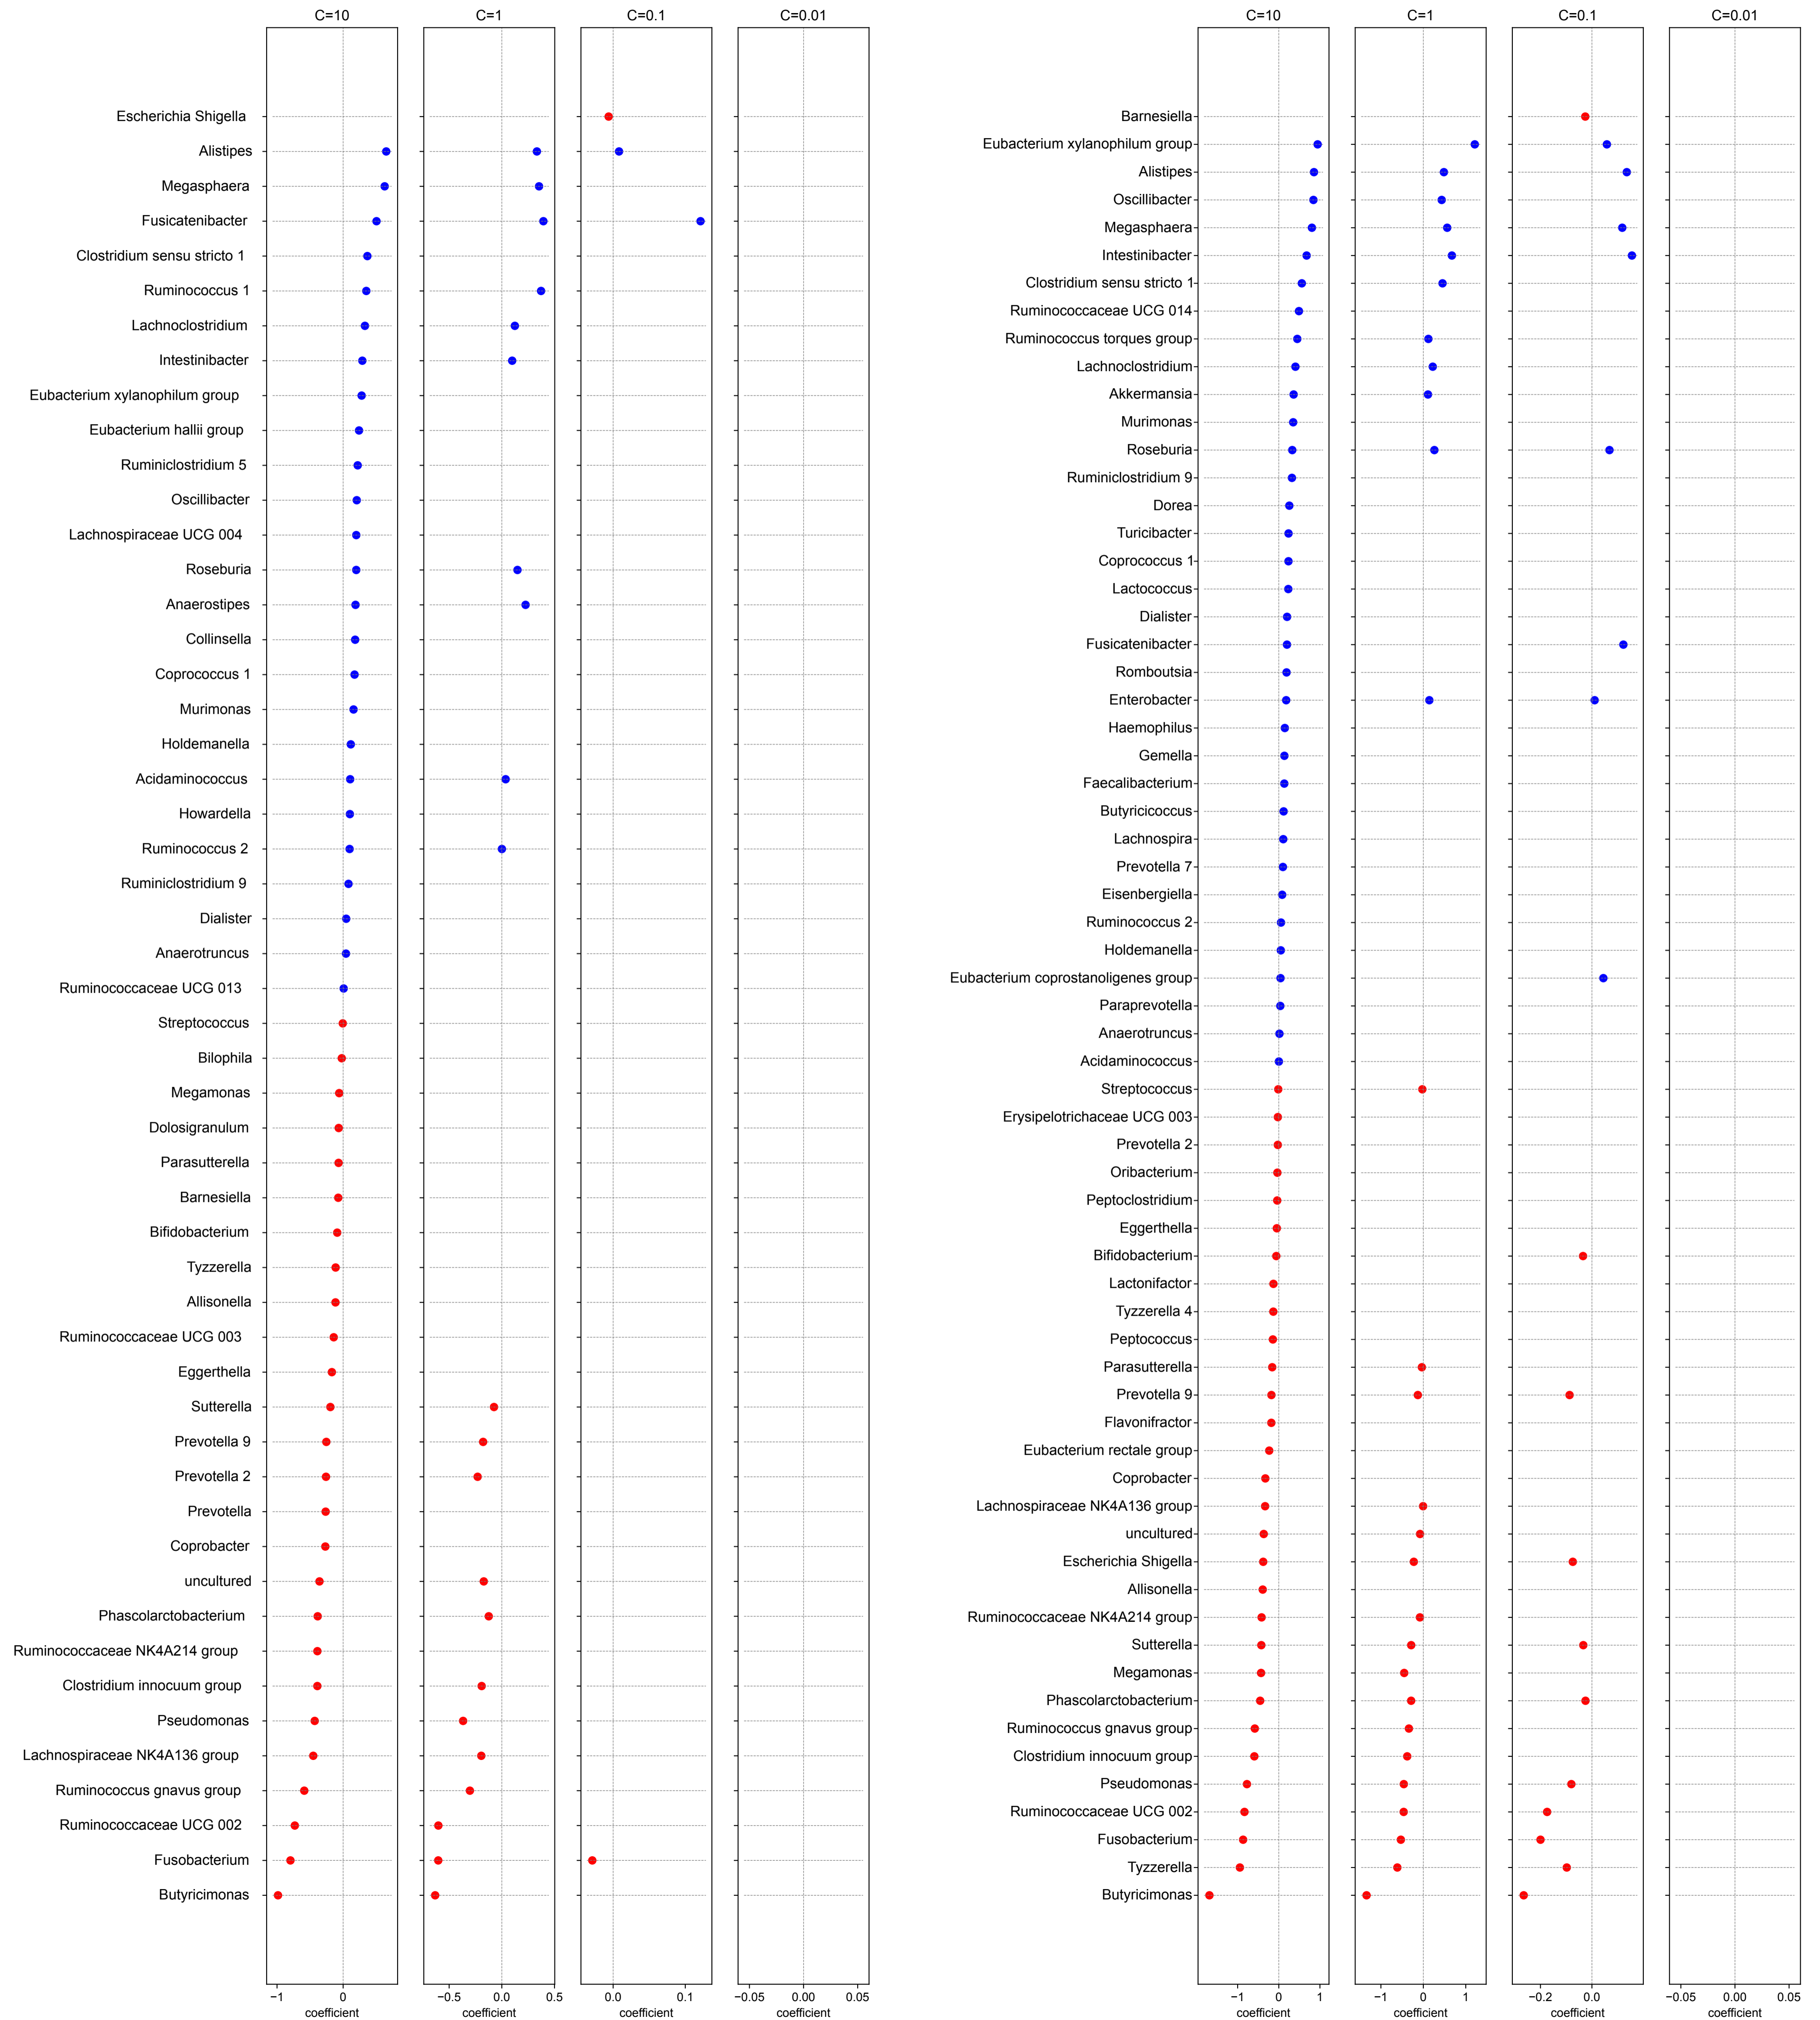

Supplement: Supplementary file [file media-5.pdf]
